# Supplementary material for: Heparin Inhibits SARS-CoV-2 Replication in Human Nasal Epithelial Cells
Source: MDPI journal article supplement (doi:10.3390/v14122620), 2022-11-24
Supplement: s1 [file s1]

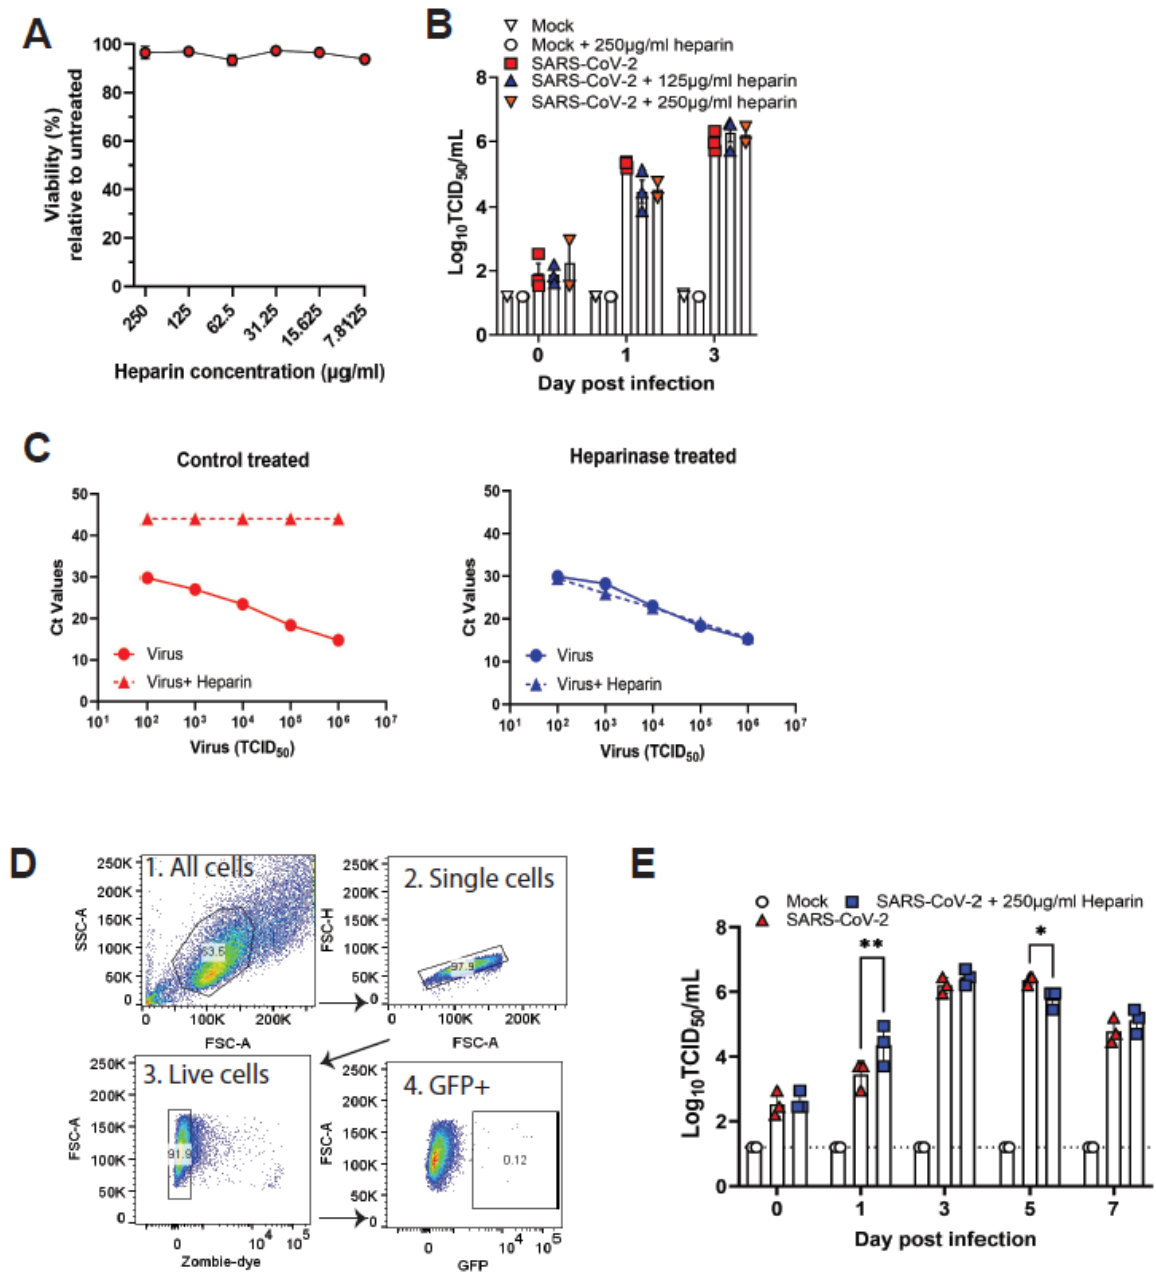

**Figure S1.** (A) Viability of Vero cells treated with indicated heparin concentrations for 3 days. Graph is a representative of 2 experiments each with 3 replicates per concentration. (B) Infectious virus titers in supernatants from Vero cells infected with SARS-CoV-2 (MOI 0.02) and cultured with or without heparin for 3 days. Graph shows the mean titer  $\pm$  SEM of 3 replicates from 3 separate experiments, except for 250  $\mu\text{g/ml}$  that was tested in 2 experiments. (C) Cycle threshold (CT) values of SARS-CoV-2 E-gene from indicated concentrations of SARS-CoV-2 virus with or without 250  $\mu\text{g/ml}$  of heparin. Isolated RNA was treated with 0.5 units of heparinase or an equivalent volume of buffer and RNaseOUT before RT-PCR analysis. (D) Flow cytometry gating strategy. (E) Infectious virus titers in apical supernatants from human nasal epithelial cells infected with virus incubated with or without heparin for 1 h prior to infection. Heparin was not present through-out the experiment. Graph shows the mean  $\pm$  SEM of 3 replicates from 1 donor. Data were analyzed using a Two-Way ANOVA with Dunnett's multiple comparisons test. \*,  $p < 0.05$  and \*\*,  $p > 0.01$ .
